# Supplementary material for: The impact of multidomain interventions on cognitive and physical function in older adults with subjective cognitive decline: a meta‑analysis and systematic review
Source: PeerJ. 2025 Jun 26;13:e19588. doi: 10.7717/peerj.19588 (PMC12206402; doi:10.7717/peerj.19588)
Supplement: Supplemental Information 6 [file peerj-13-19588-s006.xlsx]

## Sheet: Sheet1
Study	Outcome	Multidomain intervention		Control group		Nutritional intervention
		Mean difference (95% CI)	N	Mean difference (95% CI)	N	Mean difference (95% CI)	N
Andrieu et al. 2017	Global cognition	-0.180 (-0.368,0.008)	374	-0.299(-0.486，-0.112)	380
	Memory	-2.620(-4.263,0.976)	374	-0.871(-2.501,0,759)	380	-0.080(-1.721,1.561)	381
	Physical funcitoin	-0.325(-0.509,-0.141)	374	-0.260(-0.433,-0.077)	380	-0.378(-0.563,-0.193)	381
Barreto et al. 2021	Global cognition	-0.040(-0.40,-0.11)	54	-0.14(-0.52,0.23)	55
	Memory	-1.71(-2.83,-0.59)	54	-0.48(-1.58,0.62)	55
	Physical funcitoin	0.59(0.26,0.93)	54	0.35(0.01,0.68)	55
Liu et al. 2022	Global cognition	0.43(0.20,0.65)	86	0.28(0.083,0.48)	106
	Executive function	0.018(-0.18,0.22)	86	-0.14(-0.33,0.039)	106
	Memory	-0.15(-0.45,0.14)	86	0.10(-0.16,0.37)	106
Macphersona et al. 2022;	Global cognition	0.00(-0.7,0.6)	69	0.3(-5.7,6.4)	72
	Executive function	-7.8(-15.6,-0.04)	69	0.3(-5.7,6.4)	72
Chatterjee et al. 2022		Multidomain intervention			Control group
		Pre(Mean±SD)	Post(Mean±SD)	N	Pre(Mean±SD)	Post(Mean±SD)	N
	Memory	4.93±0.26	5±0	15	4.73±0.59	4.8±0.56	15
	Executive function	33.67±6.61	27.87±6.17	15	36.73±6.35	33.8±6.46	15
Blumenthal et al. 2020		Multidomain intervention			Nutritional intervention
		Pre(Mean (IQR) )	Post(Mean (IQR) )	N	Pre(Mean (IQR) )	Post(Mean (IQR) )	N
	Memory	81.1(74.6-87.6)	79.4(74.3-84.6)	81	79.6(73.0-86.3)	82.8(77.5-88.0)	79
	Executive function	40.1(34.7-45.5)	44.2(41.1-46.9)	81			79
